# Supplementary material for: Endogenous rRNA Sequence Variation Can Regulate Stress Response Gene Expression and Phenotype
Source: PubMed Central journal article supplement — Cell Rep. Author manuscript; Available in PMC 2019 Jan 1. (PMC6312700; doi:10.1016/j.celrep.2018.08.093), 2018-10-02
Supplement: NIHMS997791-supplement-Supplement.pdf [file NIHMS997791-supplement-Supplement.pdf]

**Cell Reports, Volume 25**

## **Supplemental Information**

### **Endogenous rRNA Sequence Variation Can Regulate Stress Response Gene Expression and Phenotype**

**Chad M. Kurylo, Matthew M. Parks, Manuel F. Juetten, Boris Zinshteyn, Roger B. Altman, Jordana K. Thibado, C. Theresa Vincent, and Scott C. Blanchard**

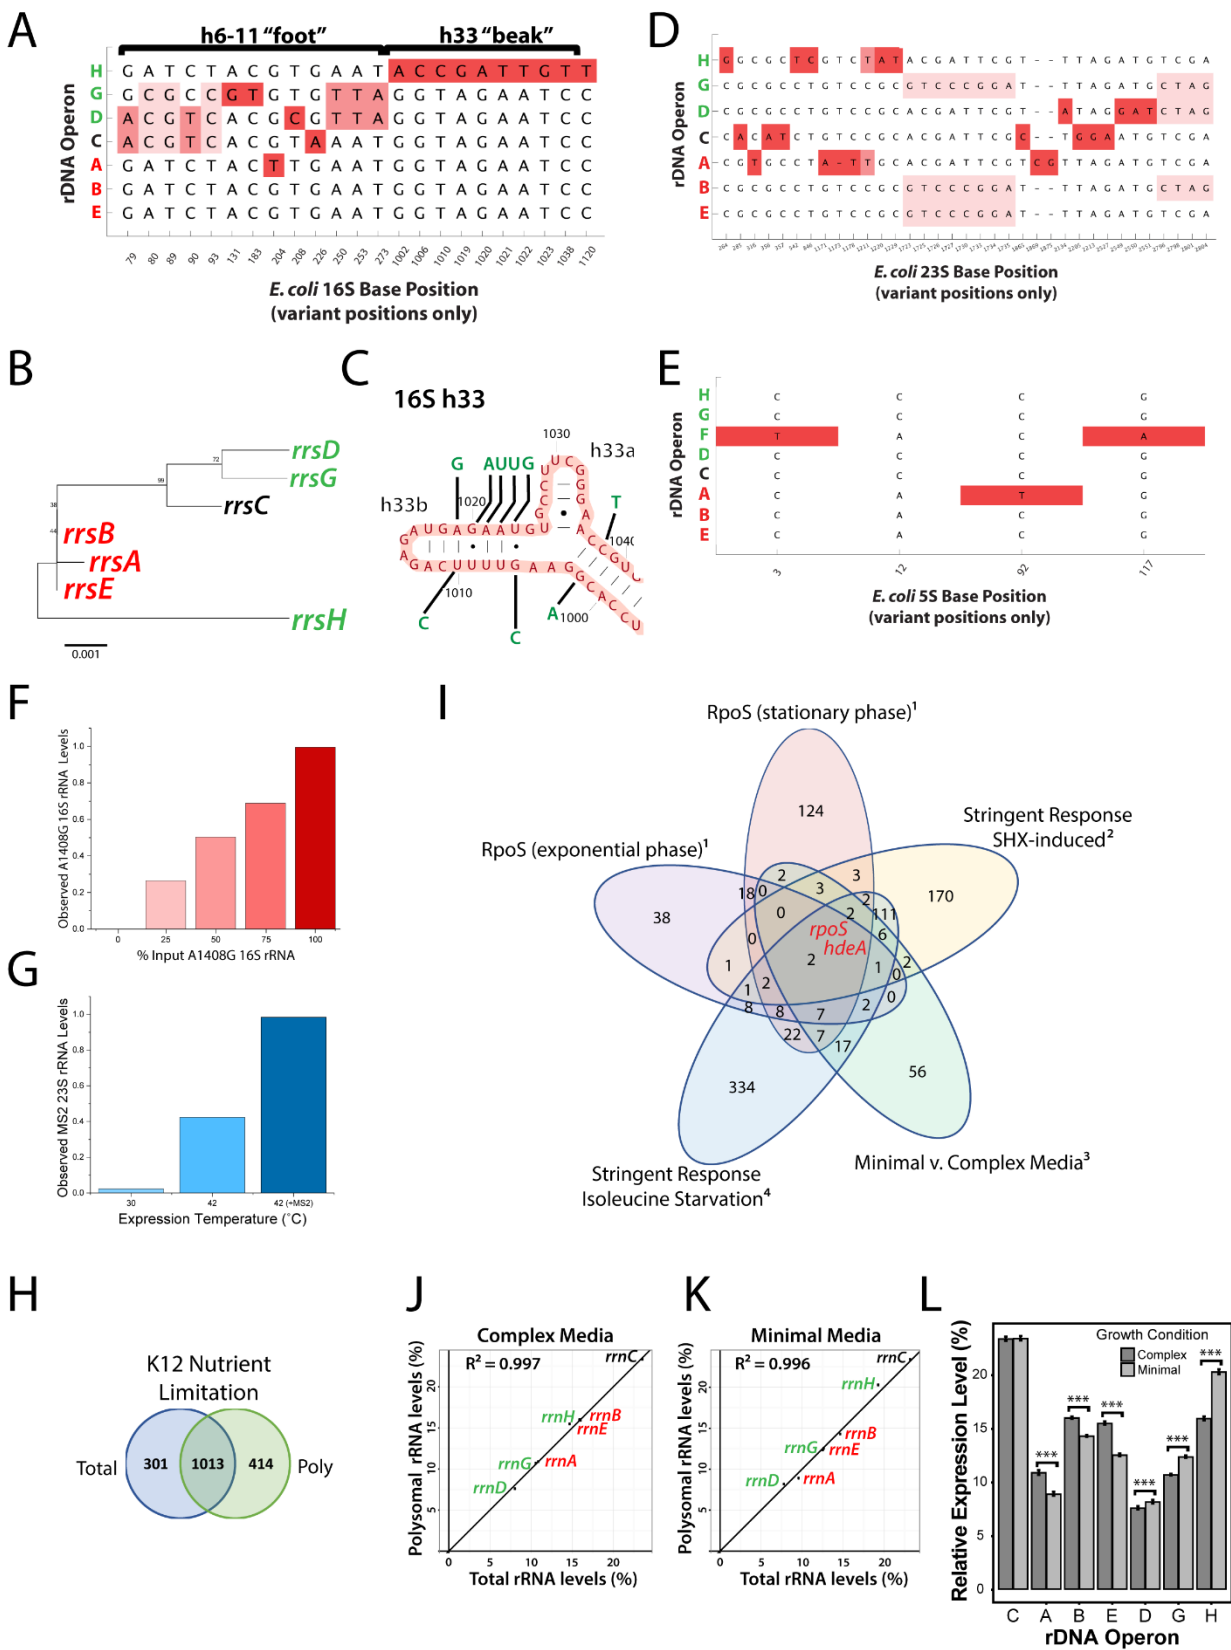

**Figure S1 (Related to Figure 1). Nutrient limitation alters the expression of rDNA operons in *E. coli*.** (A) Alignment highlighting all variant positions between 16S rRNA genes in *E. coli*. rDNA operons that are upregulated (green), and downregulated (red), on a relative basis in response to nutrient limitation are indicated on the vertical axis. The majority of variants in the 16S rRNA are located in either the h6-11 “foot” domain or the h33 “beak” domain. (B) Hierarchical clustering of *E. coli* 16S rRNA genes using the Neighbor-joining method (Saitou and Nei, 1987). Analysis was performed in MEGA6 (Tamura et al., 2013). (C) Secondary structure of h33 of the rrsB 16S rRNA according to (Stern et al., 1988). The position and identity of nucleotide variants in rrsH are indicated in green. (D-E) Alignment highlighting all variant positions between (D) 23S and (E) 5S rRNA genes in *E. coli*. rDNA operons that are upregulated (green), and downregulated (red), on a relative basis in response to nutrient limitation are indicated on the vertical axis. (F) RNA-Seq analysis of known mixtures of ribosomes with either wild-type or A1408G 16S rRNAs. The X-axis indicate the intended ratio, while the Y-axis indicates the observed ratio of A1408G to wild-type. (G) wild-type *E. coli* transformed with a heat-inducible rDNA expression plasmid encoding an MS2-tagged 23S rRNA (Wang et al., 2012). Consistent with previous literature (Youngman and Green, 2005) cells grown at 30 °C exhibit no plasmid induction, while cells grown at 42 °C exhibit strongly induced MS2-tagged rRNA expression (between 30 and 50%). MS2-tagged ribosomes can then be subsequently purified by affinity chromatography to approximately >85% purity, as previously reported (Youngman and Green, 2005). (H) Venn diagram showing the overlap between differentially expressed genes in total compared to polysomal RNA fractions of wild-type *E. coli* grown in complex or minimal media (this study). (I) Venn diagram showing the overlap between multiple independent studies of acute and chronic nutrient stress. Genes upregulated in all experiments are indicated in red. Differentially expressed gene sets obtained from <sup>1</sup>(Dong and Schellhorn, 2009), <sup>2</sup>(Durfee et al., 2008), <sup>3</sup>(Tao et al., 1999), and <sup>4</sup>(Traxler et al., 2008) as indicated. (J,K) Correlation between total RNA (X-axis) and polysomal RNA (Y-axis) levels of expressed rDNA in (J) complex and (K) minimal media. (L) The relative expression levels of individual rDNA operons in cells grown in complex or minimal media. Error bars represent the standard error of the mean and “\*\*\*” indicates  $p < 0.01$  across three biological replicates.

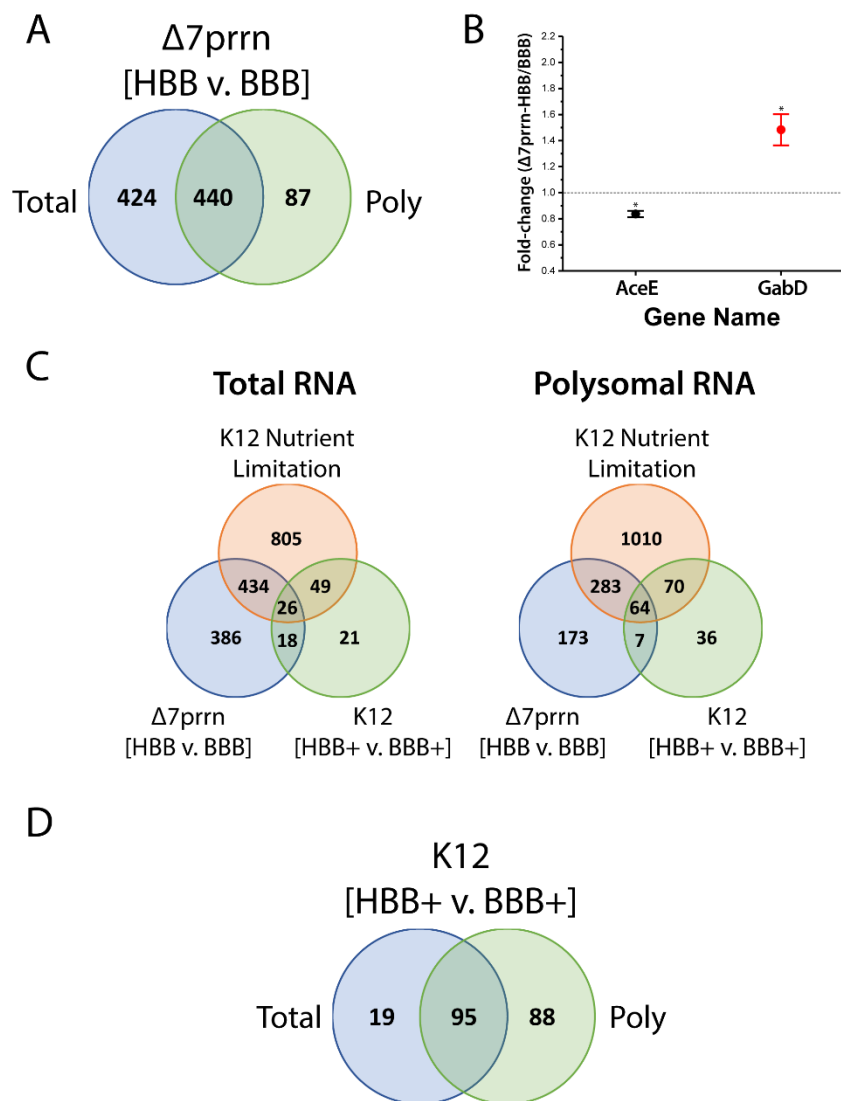

**Figure S2 (Related to Figure 2). *rrsH*-bearing ribosomes alter gene expression at both the transcriptional (total RNA) and translational (polysomal RNA) levels. (A)** Venn Diagram showing the overlap between differentially expressed genes in total compared to polysomal RNA fractions of  $\Delta 7prn$  strains expressing either pKK3535-BBB or pKK3535-HBB plasmids and grown in minimal media. **(B)** qRT-PCR validation of RNA-Seq results from the  $\Delta 7prn$ -HBB v.  $\Delta 7prn$ -BBB experiment. Two genes, one that was downregulated (*aceE*) and one that was upregulated (*gabD*) by  $\Delta 7prn$ -HBB, were selected for validation. “\*” indicates  $p < 0.05$  compared to  $\Delta 7prn$ -BBB. Error bars indicate SEM. **(C)** Venn diagrams showing the number of overlapping differentially expressed genes between wild-type *E. coli* grown in complex or minimal media (this study),  $\Delta 7prn$  strains expressing either pKK3535-BBB or pKK3535-HBB plasmids grown in minimal media, and wild-type *E. coli* K12 MG1655 expressing either pKK3535-BBB or pKK3535-HBB plasmids grown in minimal media. The left panel describes the total RNA fraction (transcriptional level), while the right panel describes the polysomal RNA fraction (translational level). **(D)** Venn Diagram showing the overlap between differentially expressed genes in total compared to polysomal RNA fractions of K-12 MG1655 strains expressing either pKK3535-BBB or pKK3535-HBB plasmids and grown in minimal media.

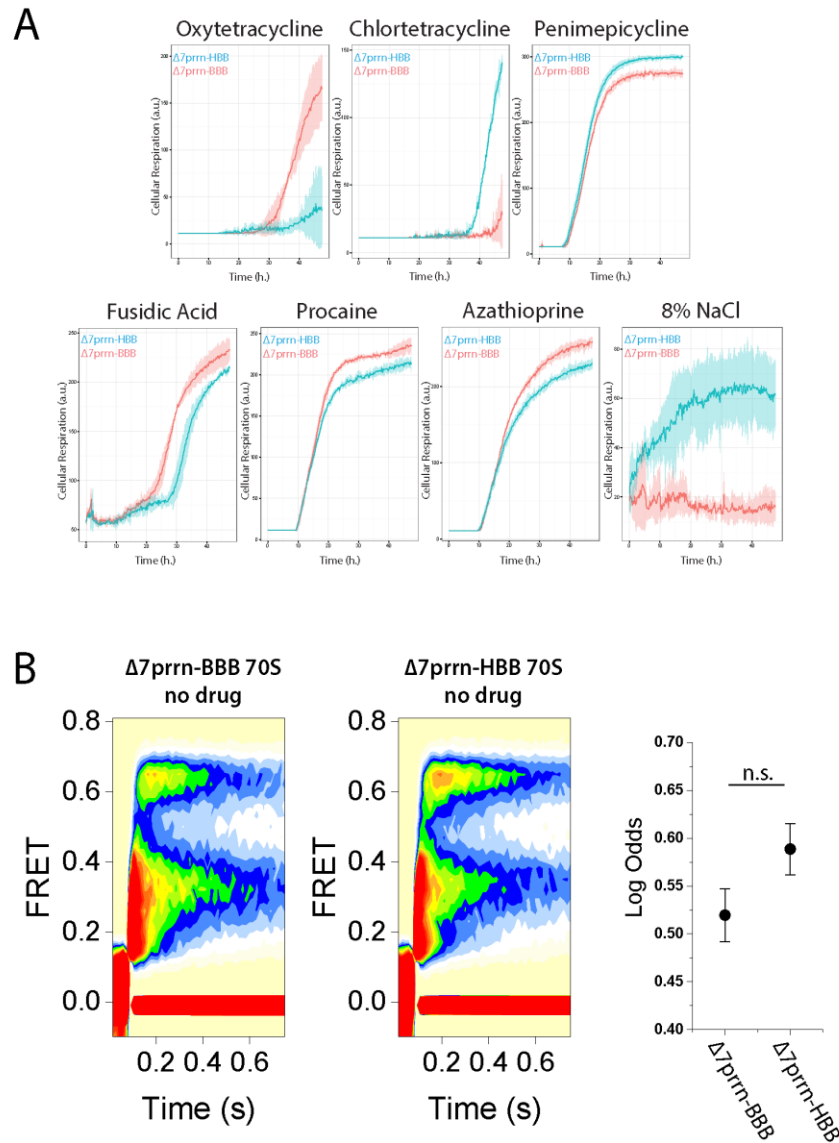

**Figure S3 (Related to Figure 3). *rrsH*-bearing ribosomes alter cellular phenotype. (A)** Growth phenotype analysis of *E. coli* strains  $\Delta 7prn\text{-}HBB$  (blue) and  $\Delta 7prn\text{-}BBB$  (red) using the BIOLOG phenotype microarray (Bochner et al., 2001). Error region indicates the standard deviation. All experiments were performed in triplicate. The top three panels are tetracycline derivatives; fusidic acid is a small-molecule inhibitor of elongation factor G (EF-G), the GTPase that catalyzes ribosome translocation (Wasserman et al., 2016); procaine is thought to affect membrane integrity related to osmotic stress (Guo and Gross, 2014); azathioprine is thought to be a purine biosynthesis inhibitor and is implicated in regulating cyclic di-GMP synthesis (Antoniani et al., 2013); 8% NaCl is an established osmotic stress (Solheim et al., 2014). **(B)** Post-synchronized, ensemble smFRET histograms of tRNA selection on (left) *rrsB*- and (middle) *rrsH*-bearing ribosomes (as indicated) in the absence of tetracycline. (Right) Log odds of tRNA accommodation ( $p=0.1$ ). Error bars indicate standard error from the mean.

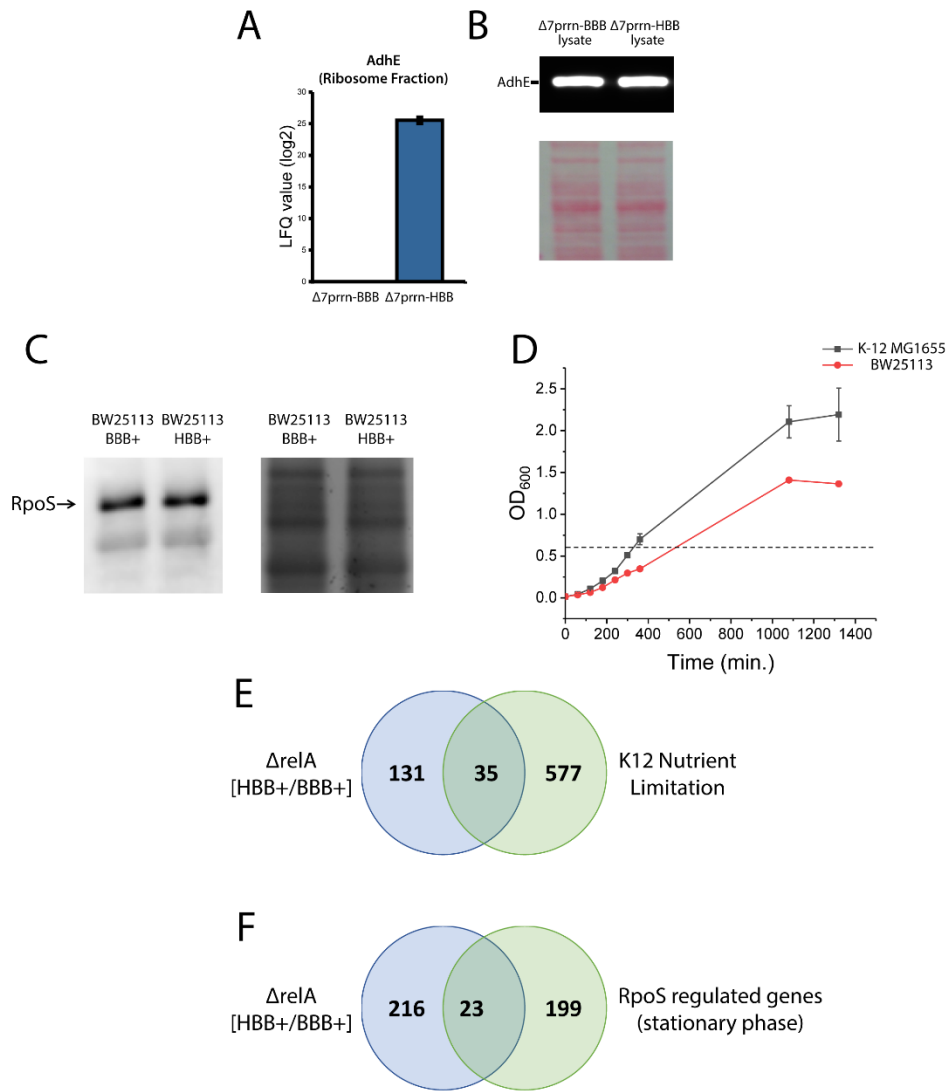

**Figure S4 (Related to Figure 4). Mass spectrometry quantification of AdhE protein levels in cells expressing *rrsB*- and *rrsH*-bearing ribosomes, characterization of BW25113-BBB+/HBB+ RpoS levels and growth in minimal media, and overlap between *rrsH*-regulated genes in the  $\Delta\text{relA}$  background and stress response programs. (A)** Quantification of AdhE data obtained from quantitative mass spectrometry investigations performed on high salt-washed TC-70S ribosomes ( $n = 3$ , **Methods**). Error bars indicate standard deviation. **(B)** Western blot for the 96 kDa AdhE protein from cell lysate. Ponceau stain of the same membrane, located beneath the blot, is included as a loading control. **(C)** Western blot for RpoS in BW25113 strains expressing either pKK3535-BBB or -HBB and harvested at  $\text{OD}_{600} = 0.6$  in minimal media. **(D)** Growth curves of *E. coli* strains K-12 MG1655 and BW25113 in minimal media. Error bars represent the standard deviation of three biological replicates and the dotted line demarcates cell density at  $\text{OD}_{600} = 0.6$ . **(E,F)** Venn diagrams showing the number of overlapping differentially expressed genes between  $\Delta\text{relA}$  *E. coli* expressing either pKK3535-BBB or pKK3535-HBB plasmids grown in minimal media and **(E)** wild-type *E. coli* K-12 MG1655 grown in complex or minimal media (this study) and **(F)** previously identified RpoS-regulated genes (Dong and Schellhorn, 2009).

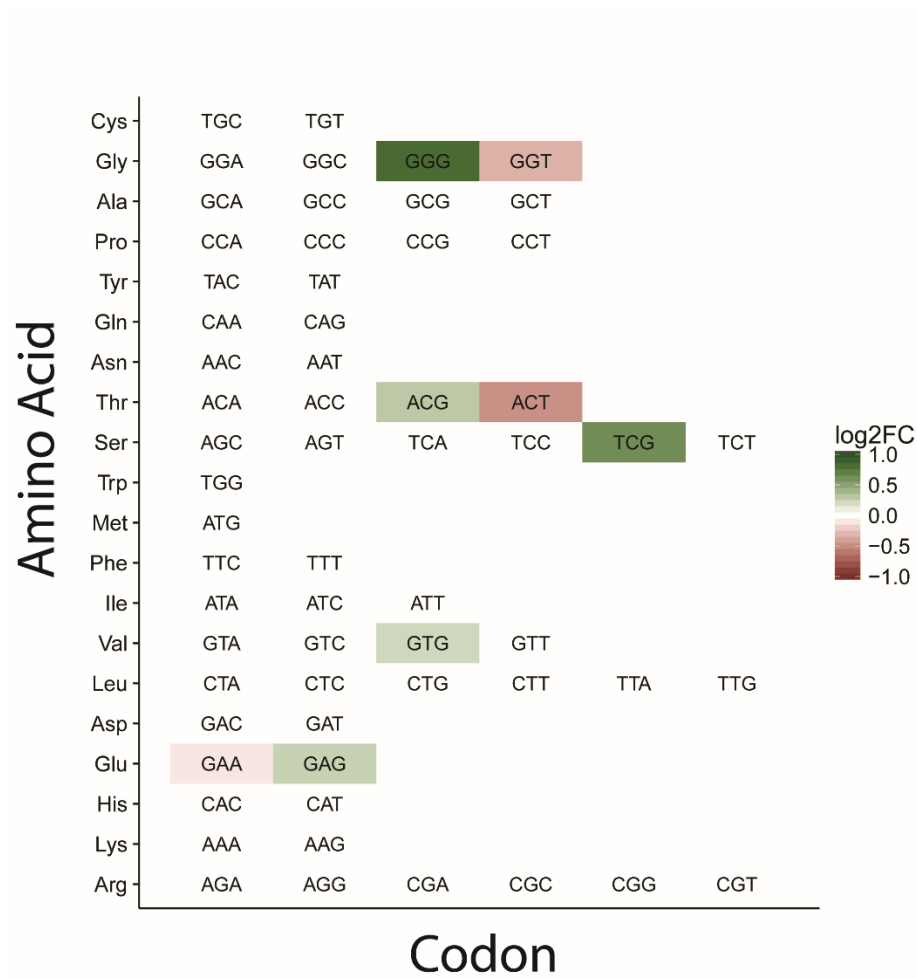

**Figure S5 (Related to Figure 5). Codon usage analysis of differentially translated genes between *E. coli* strains  $\Delta 7prn-HBB$  and  $\Delta 7prn-BBB$ .** Green-colored codons are enriched within upregulated genes in  $\Delta 7prn-HBB$  compared to  $\Delta 7prn-BBB$ , while red-colored codons are enriched within the downregulated genes in  $\Delta 7prn-HBB$  compared to  $\Delta 7prn-BBB$  (**Methods**).
